# Supplementary material for: The Thromboembolic Predictability of CHA2DS2-VASc Scores Using Different Echocardiographic Criteria for Congestive Heart Failure in Korean Patients with Nonvalvular Atrial Fibrillation
Source: MDPI journal article supplement (doi:10.3390/jcm11020300), 2022-01-07
Supplement: s1 [file s1]

## **SUPPLEMENTAL MATERIAL**

### **TITLE: The thromboembolic predictability of CHA<sub>2</sub>DS<sub>2</sub>-VASc scores using different echocardiographic criteria for congestive heart failure in Korean patients with nonvalvular atrial fibrillation**

Albert Youngwoo Jang, MD, MS<sup>1</sup>; Woong Chol Kang, MD, PhD<sup>1\*</sup>; Yae Min Park, MD, PhD<sup>1</sup>; Jeongduk Seo, MD, MS<sup>1</sup>; Kyungeun Ha, MD, MS<sup>1</sup>; Pyung Chun Oh, MD, PhD<sup>1</sup>; Kyoungheon Lee, MD, PhD<sup>1</sup>; Jeonggeun Moon, MD, PhD<sup>1\*</sup>

<sup>1</sup>Division of Cardiology, Department of Internal Medicine, Gachon University Gil Medical Center, Incheon, Republic of Korea

#### **Correspondence:**

Woong Chol Kang, MD, PhD  
Professor

Cardiology Division, Department of Internal Medicine, Gachon University Gil Medical Center  
Address: 21 Namdong-daero 774beon-gil, Namdong-gu, Incheon 21565, Republic of Korea  
Tel: +82-32-460-8305 (Office); Fax: +82-32-469-1906; E-mail: kangwch@gilhospital.com

Jeonggeun Moon, MD, PhD  
Associate Professor

Cardiology Division, Department of Internal Medicine, Gachon University Gil Medical Center  
Address: 21 Namdong-daero 774beon-gil, Namdong-gu, Incheon 21565, Republic of Korea  
Tel: +82-32-460-3054; Fax: +82-32-469-1906; E-mail: jeff76@gilhospital.com

**Number of supplementary data: 4 tables**

**Supplementary Table S1. Baseline demographic and echocardiographic features of CHA<sub>2</sub>DS<sub>2</sub>-VASc score categories.**

|                                    | All (n = 4,200) | CHA <sub>2</sub> DS <sub>2</sub> -VASc<br>Score 0-1 (n=877) | CHA <sub>2</sub> DS <sub>2</sub> -VASc<br>Score 2-3 (n=1,650) | CHA <sub>2</sub> DS <sub>2</sub> -VASc<br>Score 4-9 (n=1,673) | P       |
|------------------------------------|-----------------|-------------------------------------------------------------|---------------------------------------------------------------|---------------------------------------------------------------|---------|
| <b>Demographic data</b>            |                 |                                                             |                                                               |                                                               |         |
| Age (years)                        | 71 ± 12         | 59 ± 9                                                      | 72 ± 10                                                       | 78 ± 7                                                        | <0.001* |
| Men, n (%)                         | 2,494 (60)      | 932 (91)                                                    | 1,081 (61)                                                    | 481 (34)                                                      | <0.001* |
| CHF (ICD code or LVEF ≤ 40%)       | 1963 (47)       | 168 (19)                                                    | 703 (43)                                                      | 1092 (65)                                                     | <0.001* |
| Hypertension, n (%)                | 1,646 (39)      | 181 (18)                                                    | 617 (35)                                                      | 848 (61)                                                      | <0.001* |
| Diabetes mellitus, n (%)           | 751 (18)        | 54 (5)                                                      | 228 (13)                                                      | 469 (34)                                                      | <0.001* |
| Stroke, n (%)                      | 792 (19)        | 0 (0)                                                       | 129 (7)                                                       | 663 (47)                                                      | <0.001* |
| TIA, n (%)                         | 96 (2)          | 0 (0)                                                       | 21 (1)                                                        | 75 (5)                                                        | <0.001* |
| Thromboembolism, n (%)             | 110 (3)         | 0 (0)                                                       | 3 (0)                                                         | 107 (8)                                                       | <0.001* |
| Peripheral arterial disease, n (%) | 78 (2)          | 6 (1)                                                       | 18 (1)                                                        | 54 (4)                                                        | <0.001* |
| Myocardial infarction, n (%)       | 199 (5)         | 12 (1)                                                      | 48 (3)                                                        | 138 (10)                                                      | <0.001* |
| Aortic plaque, n (%)               | 110 (3)         | 0 (0)                                                       | 3 (0)                                                         | 107 (8)                                                       | <0.001* |
| Systolic blood pressure (mm Hg)    | 125 ± 27        | 120 ± 37                                                    | 123 ± 22                                                      | 130 ± 24                                                      | <0.001* |
| Diastolic blood pressure (mm Hg)   | 74 ± 14         | 73 ± 13                                                     | 73 ± 14                                                       | 76 ± 15                                                       | <0.001* |
| Heart rate (bpm)                   | 89 ± 26         | 85 ± 22                                                     | 90 ± 27                                                       | 90 ± 27                                                       | <0.001* |
| Height (cm)                        | 162 ± 11        | 168 ± 8                                                     | 162 ± 11                                                      | 158 ± 10                                                      | <0.001* |
| Weight (kg)                        | 64 ± 11         | 70 ± 13                                                     | 63 ± 12                                                       | 59 ± 12                                                       | <0.001* |
| BMI                                | 24.4 ± 9.5      | 25.1 ± 12.9                                                 | 24.3 ± 8.0                                                    | 24.0 ± 8.0                                                    | 0.016*  |
| <b>Echocardiographic data</b>      |                 |                                                             |                                                               |                                                               |         |
| LVEF (%)                           | 52±16           | 55±13                                                       | 52±16                                                         | 50±17                                                         | <0.001* |
| LVEDD (mm)                         | 50±6            | 50±5                                                        | 50±6                                                          | 49±7                                                          | 0.003*  |
| LVESD (mm)                         | 35±10           | 35±7                                                        | 35±8                                                          | 35±13                                                         | 0.296   |

|                                     |            |           |           |           |         |
|-------------------------------------|------------|-----------|-----------|-----------|---------|
| <b>LVEDV (mL)</b>                   | 77±37      | 83±31     | 78±37     | 71±40     | <0.001* |
| <b>LVESV(mL)</b>                    | 42±31      | 42±26     | 78±37     | 71±40     | 0.155   |
| <b>BSA (m<sup>2</sup>)</b>          | 1.7±0.2    | 1.8±0.2   | 1.7±0.2   | 1.6±0.2   | <0.001* |
| <b>LVEDD/BSA (mm/m<sup>2</sup>)</b> | 30±5       | 28±4      | 30±4      | 31±5      | <0.001* |
| <b>LVESD/BSA (mm/m<sup>2</sup>)</b> | 21±6       | 19±4      | 21±5      | 22±7      | <0.001* |
| <b>LVEDV/BSA (mL/m<sup>2</sup>)</b> | 46±21      | 46±17     | 46±20     | 45±24     | 0.209   |
| <b>LVESV/BSA (mL/m<sup>2</sup>)</b> | 25±18      | 24±14     | 26±18     | 26±20     | 0.015*  |
| <b>LA diameter (mm)</b>             | 45±16      | 43±15     | 46±15     | 45±16     | 0.003*  |
| <b>LVMI (g/m<sup>2</sup>)</b>       | 97±31      | 92±25     | 98±34     | 101±31    | <0.001* |
| <b>RWT</b>                          | 0.37±0.12  | 0.36±0.07 | 0.37±0.14 | 0.37±0.12 | 0.093   |
| <b>LAVI (mL/m<sup>2</sup>)</b>      | 49±22      | 43±19     | 50±22     | 54±25     | <0.001* |
| <b>E/E'</b>                         | 13±6       | 11±5      | 13±6      | 15±7      | <0.001* |
| <b>Septal E' velocity (cm/s)</b>    | 7±3        | 8±4       | 7±2       | 6±2       | <0.001* |
| <b>TR velocity max (m/s)</b>        | 2.5±0.4    | 2.4±0.4   | 2.5±0.4   | 2.6±0.5   | <0.001* |
| <b>mDT (msec)</b>                   | 118±114    | 117±64    | 119±104   | 118±139   | 0.974   |
| <b>LVH, n(%)</b>                    | 1,373 (33) | 167 (16)  | 589 (33)  | 617 (44)  | <0.001* |

CHF, congestive heart failure; ICD, the International Statistical Classification of Diseases and Related Health Problem; TIA, Transient ischemic attack; BMI, body mass index; LVEF, ejection fraction; LVEDD, left ventricular end diastolic dimension; LVESD, left ventricular end systolic dimension; LVEDV, left ventricular end diastolic volume; LVESV, left ventricular end systolic volume; BSA, body surface area; LA, left atrial; LVMI, left ventricular mass index; LAVI, left atrial volume index; E/E', the ratio of early diastolic mitral inflow velocity to early diastolic velocity of the mitral annulus; RWT, relative wall thickness; mDT, mitral deceleration time; LVH, echocardiographic left ventricular hypertrophy

\* p < 0.05

**Supplementary Table S2. Univariate Cox regression models for CATE.**

|                                          | CATE |            |        |
|------------------------------------------|------|------------|--------|
|                                          | HR   | 95% CI     | p      |
| <b>RFCA or CV</b>                        | 0.15 | 0.021-1.07 | 0.059  |
| <b>Anticoagulation</b>                   | 0.30 | 0.20-0.45  | <0.001 |
| <b>Anticoagulation duration (months)</b> | 0.94 | 0.91-0.96  | <0.001 |
| <b>Antiplatelet</b>                      | 0.25 | 0.13-0.957 | 0.020  |
| <b>ACEi/ARB</b>                          | 0.28 | 0.18-0.43  | <0.001 |
| <b>BB</b>                                | 0.41 | 0.27-0.63  | <0.001 |
| <b>CCB</b>                               | 0.40 | 0.18-0.91  | 0.028  |
| <b>Antiarrhythmic drugs</b>              | 0.09 | 0.02-0.35  | <0.001 |
| <b>Diuretics</b>                         | 0.39 | 0.26-0.58  | <0.001 |
| <b>Electrocardiographic LVH</b>          | 1.12 | 0.88-1.64  | 0.257  |
| <b>Height (cm)</b>                       | 0.99 | 0.98-1.80  | 0.233  |
| <b>Weight (kg)</b>                       | 0.98 | 0.96-1.59  | 0.234  |
| <b>ICD code or LVEF≤40%</b>              | 0.98 | 0.73-1.33  | 0.901  |
| <b>LVEF≤40%</b>                          | 1.12 | 0.79-1.61  | 0.521  |
| <b>HFpEF</b>                             | 1.04 | 0.64-1.67  | 0.881  |
| <b>E/E' ≥ 11</b>                         | 1.30 | 0.91-1.84  | 0.146  |
| <b>LAVI &gt; 34 ml/m<sup>2</sup></b>     | 1.24 | 0.85-1.82  | 0.261  |
| <b>TR max PG ≥ 2.8 m/s</b>               | 1.28 | 0.85-2.04  | 0.218  |
| <b>LVEF ≤ 40% and mDT ≥160 msec</b>      | 0.85 | 0.54-1.34  | 0.482  |
| <b>DD</b>                                | 1.19 | 0.73-1.94  | 0.486  |
| <b>ICD code</b>                          | 0.87 | 0.63-1.20  | 0.399  |

CATE, composite adverse thromboembolic events; LVH, left ventricular hypertrophy; RFCA: radiofrequency catheter ablation; CV, cardioversion; ACEi/ARB, angiotensin converting enzyme inhibitor/angiotensin receptor blocker; BB: beta blocker, CCB, calcium channel blocker

All other abbreviations are listed in Tables 1, 2 and 3.

**Supplementary Table S3. Multivariable-adjusted Cox regression analysis of each CHA<sub>2</sub>DS<sub>2</sub>-VASc scores using different definitions for congestive heart failure in predicting composite thromboembolic events after excluding patients administered with anticoagulation**

| Definition of C criterion of CHA <sub>2</sub> DS <sub>2</sub> -VASc score | CATE (N = 143 events out of total N = 2752) |           |       |
|---------------------------------------------------------------------------|---------------------------------------------|-----------|-------|
|                                                                           | Adjusted HR                                 | 95% CI    | P     |
| ICD code or LVEF≤40%                                                      | 1.12                                        | 0.90-1.39 | 0.330 |
| LVEF≤40%                                                                  | 1.21                                        | 0.97-1.50 | 0.095 |
| HFpEF                                                                     | 1.20                                        | 0.97-1.49 | 0.098 |
| E/E'≥11                                                                   | 1.29                                        | 1.02-1.63 | 0.033 |
| LVEF≤40% and mDT≥160 msec                                                 | 1.24                                        | 0.90-1.72 | 0.192 |
| DD                                                                        | 1.20                                        | 0.97-1.49 | 0.098 |
| ICD code                                                                  | 1.06                                        | 0.85-1.32 | 0.601 |

Adjusted for cardioversion or RFCA, ACEi/ARBs, beta blocker, calcium channel blocker, antiarrhythmics, and diuretics

All other abbreviations are listed in Table 3.

Adjusted hazard ratio and 95% confidence intervals of other adjusted variables are shown in Supplementary Table S2.

\*p<0.05

**Supplementary Table S4. C-statistics of different definitions used for congestive heart failure of the CHA<sub>2</sub>DS<sub>2</sub>-VASc scores in predicting composite adverse thromboembolic events**

| <b>C-statistics for CATE</b>                                     | <b>C-statistic (95% CI)</b> | <b>P</b> |
|------------------------------------------------------------------|-----------------------------|----------|
| CHA <sub>2</sub> DS <sub>2</sub> -VASc (E/E' ≥ 11)               | 0.53 (0.48-0.59)            | 0.313    |
| CHA <sub>2</sub> DS <sub>2</sub> -VASc (LVEF ≤ 40% and ICD code) | 0.49 (0.43-0.55)            | 0.776    |
| CHA <sub>2</sub> DS <sub>2</sub> -VASc (LVEF ≤ 40%)              | 0.51 (0.45-0.56)            | 0.829    |
| CHA <sub>2</sub> DS <sub>2</sub> -VASc (HFpEF)                   | 0.50 (0.45-0.56)            | 0.897    |
| CHA <sub>2</sub> DS <sub>2</sub> -VASc (ICD code)                | 0.51 (0.46-0.55)            | 0.755    |

All abbreviations are listed in Supplementary Tables S2 and S3.
